# Supplementary material for: Myocardial Injury Caused by Chronic Alcohol Exposure—A Pilot Study Based on Proteomics
Source: MDPI journal article supplement (doi:10.3390/molecules27134284), 2022-07-03
Supplement: s1 [file s1]

## Supplementary tables

**Table S1.** Peptide fraction separation liquid chromatography elution gradient table.

| Time (min) | Flow rate (mL/min) | Mobile phase A (%) | Mobile phase B (%) |
|------------|--------------------|--------------------|--------------------|
| 0          | 1                  | 97                 | 3                  |
| 10         | 1                  | 95                 | 5                  |
| 30         | 1                  | 80                 | 20                 |
| 48         | 1                  | 60                 | 40                 |
| 50         | 1                  | 50                 | 50                 |
| 53         | 1                  | 30                 | 70                 |
| 54         | 1                  | 0                  | 100                |

**Table S2.** Liquid chromatography elution gradient table.

| <b>Time (min)</b> | <b>Flow rate (mL/min)</b> | <b>Mobile phase A (%)</b> | <b>Mobile phase B (%)</b> |
|-------------------|---------------------------|---------------------------|---------------------------|
| 0                 | 600                       | 94                        | 6                         |
| 2                 | 600                       | 85                        | 15                        |
| 48.5              | 600                       | 60                        | 40                        |
| 50.5              | 600                       | 50                        | 50                        |
| 51.5              | 600                       | 45                        | 55                        |
| 60                | 600                       | 0                         | 100                       |

**Table S3.** The analysis parameter of Proteome Discoverer 2.4.

| Item                       | Value                                                                                                                            |
|----------------------------|----------------------------------------------------------------------------------------------------------------------------------|
| Type of Quantification     | Reporter Quantification (TMT)                                                                                                    |
| Enzyme                     | Trypsin                                                                                                                          |
| Max. Missed Cleavage Sites | 2                                                                                                                                |
| Precursor Mass Tolerance   | 10 ppm                                                                                                                           |
| Fragment Mass Tolerance    | 0.02 Da                                                                                                                          |
| Dynamic Modification       | Oxidation/+15.995 Da (M) and TMT /+229.163 Da (K)                                                                                |
| N-Terminal Modification    | Acetyl/+42.011 Da (N-Terminal) and TMT 10plex/+229.163 Da (K, Y) and<br>Met-loss/-131.040Da(M) and Met-loss+Acetyl/-89.030 Da(M) |
| Static Modification        | Carbamidomethyl/+57.021 Da (C)                                                                                                   |

**Table S4.** The primer sequences from NCBI.

| Target | Species | Forward                | Reverse                 |
|--------|---------|------------------------|-------------------------|
| Acot 1 | Mouse   | AGTGCTGATTCAAGGGCTGG   | TTCTCGCAGCTGGATTGAAC    |
| Mup 1  | Mouse   | CCAGGCCCCGAGAATGAAGAA  | GGCCTCTCCATGAACACCAA    |
| Mt 1   | Mouse   | CGACTTCAACGTCCTGAGTAC  | GTCCATTCCGAGATCTGGTG    |
| TPM 1  | Mouse   | ACAGAACCATTAACAGCCAGAG | TGAACAAAAGACCCCAGAGG    |
| Actc 1 | Mouse   | AGGATGACCGTATTGTGCTTC  | AACAAACTGCACTTGTGTAAACA |
